# Supplementary material for: Microbial biotransformation of DON: molecular basis for reduced toxicity
Source: PubMed Central journal article supplement (PMC4933977; doi:10.1038/srep29105), 2016-07-06
Supplement: srep29105-s1.pdf [file srep29105-s1.pdf]

1 **Microbial biotransformation of DON: molecular basis for reduced toxicity**

2

3 *Alix Pierron<sup>1,2,3\*</sup> and Sabria Mimoun<sup>1,2\*</sup>, Leticia S. Murate<sup>1,4</sup>, Nicolas Loiseau<sup>1,2</sup>, Yannick*  
4 *Lippi<sup>1,2</sup>, Ana-Paula F.L. Bracarense<sup>4</sup>, Gerd Schatzmayr<sup>3</sup>, Jian Wei He<sup>5</sup>, Ting Zhou<sup>5</sup>, Wulf-*  
5 *Dieter Moll<sup>3</sup> and Isabelle P. Oswald<sup>1,2</sup>*

6

7

8 <sup>1</sup> *Toxalim, Research Center in Food Toxicology, Université de Toulouse, INRA, UMR 1331,*  
9 *ENVT, INP-Purpan Toulouse, France*

10 <sup>2</sup> *Université de Toulouse, INP, UMR 1331, Toxalim, Toulouse, France*

11 <sup>3</sup> *BIOMIN Research Center Technopark 1, 3430 Tulln, Austria*

12 <sup>4</sup> *Universidade Estadual de Londrina, Lab. Patologia Animal, CP 6001, Londrina, Paraná,*  
13 *Brazil*

14 <sup>5</sup> *Guelph Food Research Center Agriculture & Agri-Food Canada, Guelph, Ontario N1G 5C,*  
15 *Canada*

16 \* *equally contributed*

17

18

19 *Address correspondence to*

20 *Dr. Isabelle P. Oswald*

21 *INRA, UMR-1331, Toxalim, 180 chemin de Tournefeuille, 31027 Toulouse cedex 3, France*

22 *Phone +33 582066366*

23 *E-Mail: [Isabelle.Oswald@toulouse.inra.fr](mailto:Isabelle.Oswald@toulouse.inra.fr)*

24

25 **Supplementary materials**

26

27

28 **Supplementary Figure S1.** Molecular structures of DON, deepoxy-DON and 3-epi-DON.

29

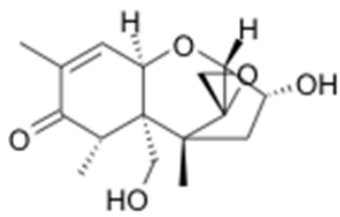

**DON**

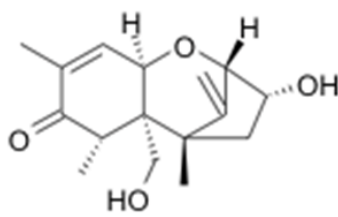

**deepoxy-DON**

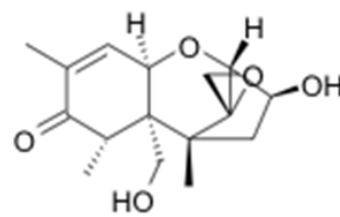

**3-epi-DON**

30

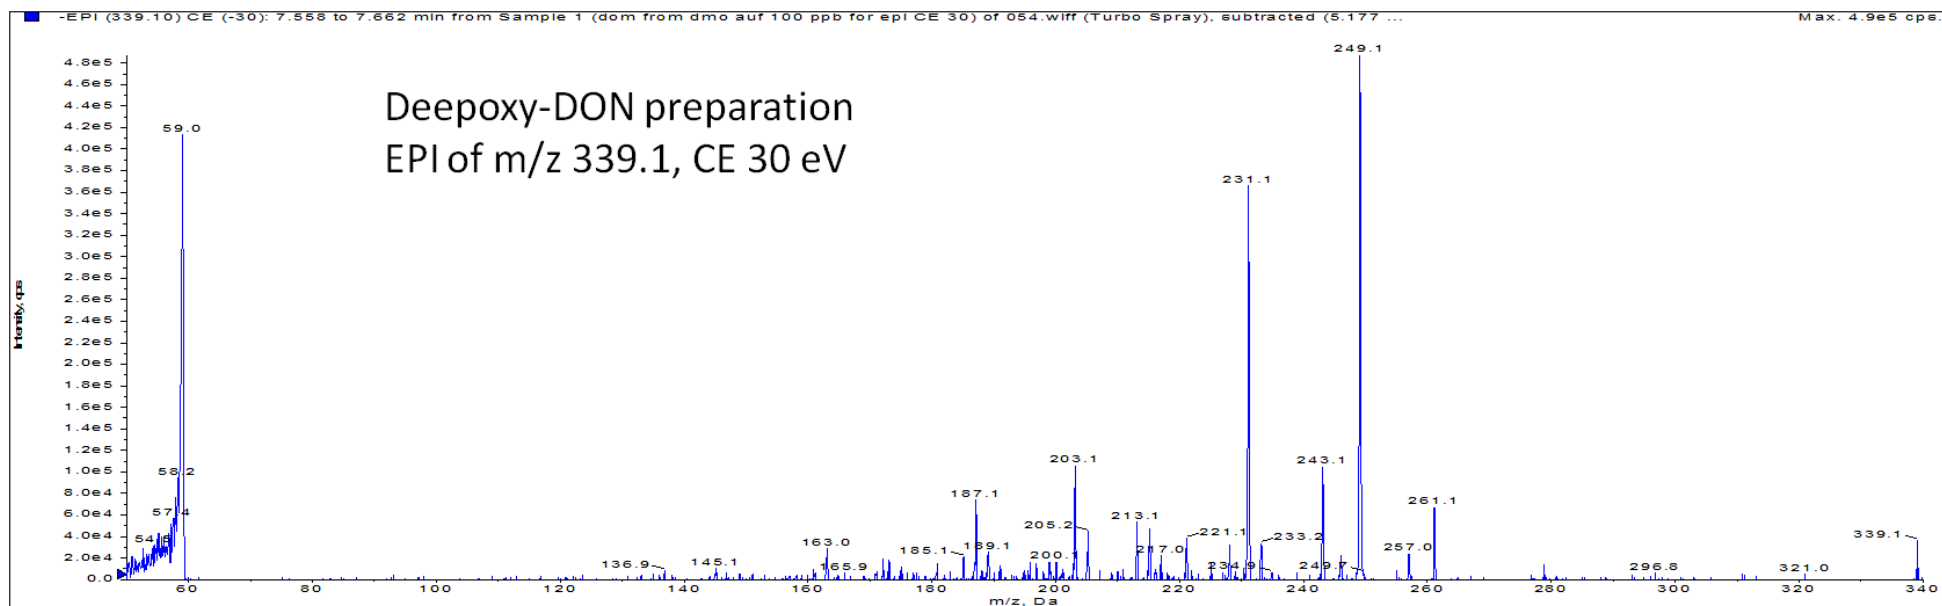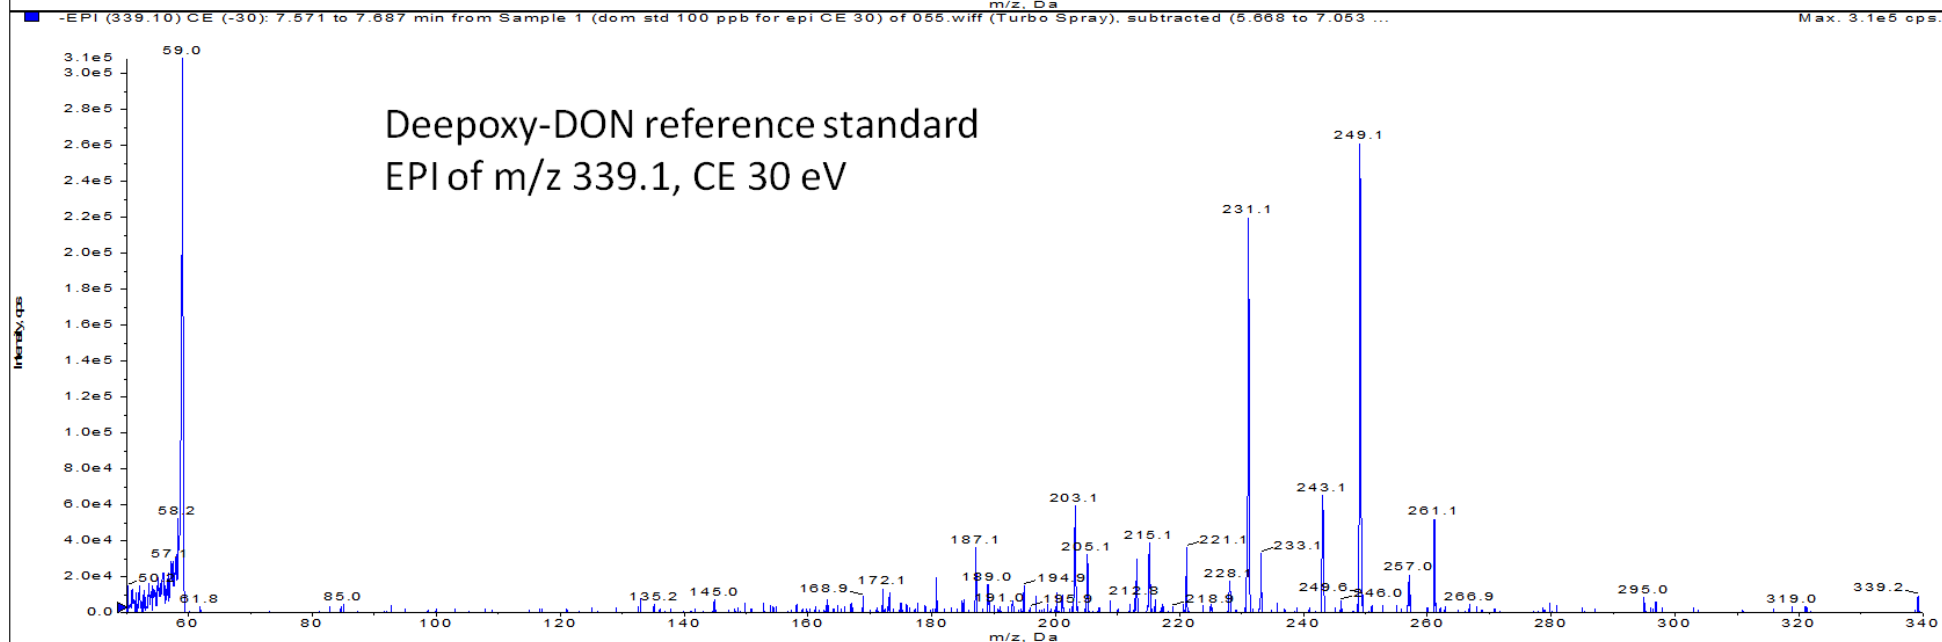

32 **Supplementary Figure S2.** Enhanced product ion spectra of parent ion [Deepoxy-DON +  
 33 acetate]- ( $m/z = 339.1$ ) recorded on a 4000 QTrap mass spectrometer at a collision energy of  
 34 30 eV. Top: our preparation used for the experiments; bottom: reference standard (Romer  
 35 Labs, Tulln, Austria).

36

37

38 **Supplementary Table S1.** Primer sequences used for RT-qPCR analysis (F: Forward; R:  
 39 Reverse)

40

| Gene symbol    | Gene name                    | Primer sequence                                          | References                            |
|----------------|------------------------------|----------------------------------------------------------|---------------------------------------|
| <i>CycloA</i>  | Cyclophilin A                | F: CCCACCGTCTTCTTCGACAT<br>R: TCTGCTGTCTTTGGAACCTTTGTCT  | NM_214353<br>Gourbeyre et al. 2015    |
| <i>RPL32</i>   | Ribosomal Protein L32        | F: AGTTCATCCGGCACCAGTCA<br>R: GAACCTTCTCCGCACCCTGT       | NM_001001636<br>Gourbeyre et al. 2015 |
| <i>IL1A</i>    | Interleukin 1- alpha         | F: TCAGCCGCCATCCA<br>R: AGCCCCGGTGCCATGT                 | NM_214029,1<br>Cano et al. 2013       |
| <i>IL1B</i>    | Interleukin 1 - beta         | F: ATGCTGAAGGCTCTCCACCTC<br>R: TTGTTGCTATCATCTCCTTGAC    | NM_214055<br>Gourbeyre et al. 2015    |
| <i>IL8</i>     | Interleukin - 8              | F: GCTCTCTGTGAGGCTGCAGTTC<br>R: AAGGTGTGGAATGCGTATTTATGC | NM_213867<br>Grenier et al. 2011      |
| <i>TNFA</i>    | Tumor necrosis factor -alpha | F: ACTGCACTTCGAGGTTATCGG<br>R: GCGACGGGCTTATCTGA         | NM_214022<br>Gourbeyre et al. 2015    |
| <i>IL12p40</i> | Interleukin 12 - p 40        | F: GGTTTCAGACCCGACGAACTCT<br>R : CATATGGCCACAATGGGAGATG  | NM_214013<br>Cano et al., 2013        |
| <i>IL17A</i>   | Interleukin 17 - alpha       | F: CCAGACGGCCCTCAGATTAC<br>R: CACTTGGCCTCCCAGATCAC       | AB102693<br>Cano et al. 2013          |
| <i>IL22</i>    | Interleukin - 22             | F: AAGCAGGTCCTGAACTTCAC<br>R: CACCCTTAATACGGCATTGG       | AY937228<br>Cano et al. 2013          |

41

42

43 **Supplementary Table S2:** Complete list of differentially expressed genes in DON treated  
 44 intestinal explants

| Gene symbol                | Gene name | -log<br>(p-value) | Ratio |
|----------------------------|-----------|-------------------|-------|
| <i>Up- regulated genes</i> |           |                   |       |

|                   |                                                                                     |       |          |
|-------------------|-------------------------------------------------------------------------------------|-------|----------|
| <i>IL1B</i>       | interleukin 1. beta                                                                 | 4.428 | 1.29E-11 |
| <i>CCL20</i>      | chemokine (C-C motif) ligand 20                                                     | 3.481 | 1.79E-06 |
| <i>IL1A</i>       | interleukin 1. alpha                                                                | 3.207 | 6.46E-09 |
| <i>CXCL2</i>      | chemokine (C-X-C motif) ligand 2                                                    | 3.129 | 1.87E-04 |
| <i>IL22</i>       | interleukin 22                                                                      | 2.955 | 1.13E-07 |
| <i>PRDM1</i>      | PR domain containing 1. with ZNF domain                                             | 2.793 | 4.76E-06 |
| <i>AREG/AREGB</i> | amphiregulin                                                                        | 2.662 | 1.94E-11 |
| <i>CSF2</i>       | colony stimulating factor 2 (granulocyte-macrophage)                                | 2.593 | 1.86E-05 |
| <i>IL8</i>        | interleukin 8                                                                       | 2.585 | 1.25E-06 |
| <i>FOSL1</i>      | FOS-like antigen 1                                                                  | 2.447 | 4.22E-04 |
| <i>IER3</i>       | immediate early response 3                                                          | 2.446 | 1.95E-04 |
| <i>CCR7</i>       | chemokine (C-C motif) receptor 7                                                    | 2.325 | 1.79E-08 |
| <i>CALCB</i>      | calcitonin-related polypeptide beta                                                 | 2.313 | 9.03E-11 |
| <i>GADD45A</i>    | growth arrest and DNA-damage-inducible. alpha                                       | 2.270 | 5.61E-08 |
| <i>TNFAIP3</i>    | tumor necrosis factor. alpha-induced protein 3                                      | 2.260 | 1.36E-08 |
| <i>RND1</i>       | Rho family GTPase 1                                                                 | 2.255 | 3.24E-06 |
| <i>IER2</i>       | immediate early response 2                                                          | 2.227 | 3.44E-06 |
| <i>CD83</i>       | CD83 molecule                                                                       | 2.207 | 1.10E-05 |
| <i>PLAUR</i>      | plasminogen activator. urokinase receptor                                           | 2.085 | 9.86E-04 |
| <i>BTG2</i>       | BTG family. member 2                                                                | 2.073 | 1.25E-06 |
| <i>IFRD1</i>      | interferon-related developmental regulator 1                                        | 2.025 | 1.14E-08 |
| <i>RGS1</i>       | regulator of G-protein signaling 1                                                  | 2.020 | 3.24E-06 |
| <i>GEM</i>        | GTP binding protein overexpressed in skeletal muscle                                | 2.013 | 4.52E-05 |
| <i>CCL4</i>       | chemokine (C-C motif) ligand 4                                                      | 2.004 | 6.44E-04 |
| <i>STX11</i>      | syntaxin 11                                                                         | 1.989 | 4.27E-05 |
| <i>GADD45G</i>    | growth arrest and DNA-damage-inducible. gamma                                       | 1.881 | 2.26E-06 |
| <i>GADD45B</i>    | growth arrest and DNA-damage-inducible. beta                                        | 1.873 | 9.01E-04 |
| <i>NEDD9</i>      | neural precursor cell expressed. developmentally down-regulated 9                   | 1.870 | 1.15E-10 |
| <i>LAMA3</i>      | laminin. alpha 3                                                                    | 1.858 | 2.07E-05 |
| <i>CD274</i>      | CD274 molecule                                                                      | 1.846 | 8.75E-11 |
| <i>IL17A</i>      | interleukin 17A                                                                     | 1.844 | 2.11E-11 |
| <i>NFKBIA</i>     | nuclear factor of kappa light polypeptide gene enhancer in B-cells inhibitor. alpha | 1.779 | 3.53E-05 |
| <i>SOCS3</i>      | suppressor of cytokine signaling 3                                                  | 1.771 | 2.54E-06 |
| <i>F3</i>         | coagulation factor III (thromboplastin. tissue factor)                              | 1.754 | 4.29E-05 |
| <i>IDO1</i>       | indoleamine 2,3-dioxygenase 1                                                       | 1.748 | 2.92E-07 |
| <i>HAMP</i>       | hepcidin antimicrobial peptide                                                      | 1.724 | 7.77E-07 |
| <i>SPRY2</i>      | sprouty homolog 2 (Drosophila)                                                      | 1.723 | 1.83E-07 |

|                |                                                                                    |       |          |
|----------------|------------------------------------------------------------------------------------|-------|----------|
| <i>PHLDA1</i>  | pleckstrin homology-like domain, family A, member 1                                | 1.708 | 1.57E-06 |
| <i>NABP1</i>   | nucleic acid binding protein 1                                                     | 1.681 | 3.78E-07 |
| <i>BCL2A1</i>  | BCL2-related protein A1                                                            | 1.681 | 5.18E-08 |
| <i>GPR65</i>   | G protein-coupled receptor 65                                                      | 1.677 | 5.79E-10 |
| <i>TBC1D4</i>  | TBC1 domain family, member 4                                                       | 1.652 | 2.82E-08 |
| <i>NFKBIZ</i>  | nuclear factor of kappa light polypeptide gene enhancer in B-cells inhibitor, zeta | 1.652 | 6.58E-06 |
| <i>ADAMTS1</i> | ADAM metalloproteinase with thrombospondin type 1 motif, 1                         | 1.652 | 5.54E-06 |
| <i>TNF</i>     | tumor necrosis factor                                                              | 1.647 | 4.65E-06 |
| <i>GPR183</i>  | G protein-coupled receptor 183                                                     | 1.609 | 6.59E-07 |
| <i>ENC1</i>    | ectodermal-neural cortex 1 (with BTB domain)                                       | 1.602 | 3.23E-05 |
| <i>BIRC3</i>   | baculoviral IAP repeat containing 3                                                | 1.596 | 2.03E-07 |
| <i>IL17F</i>   | interleukin 17F                                                                    | 1.527 | 5.39E-09 |
| <i>RCAN1</i>   | regulator of calcineurin 1                                                         | 1.524 | 2.18E-04 |
| <i>SELE</i>    | selectin E                                                                         | 1.521 | 2.09E-04 |
| <i>ZFAND5</i>  | zinc finger, AN1-type domain 5                                                     | 1.517 | 8.21E-09 |
| <i>EPHA2</i>   | EPH receptor A2                                                                    | 1.512 | 1.39E-06 |
| <i>ABTB2</i>   | ankyrin repeat and BTB (POZ) domain containing 2                                   | 1.504 | 3.43E-08 |
| <i>ADM</i>     | adrenomedullin                                                                     | 1.481 | 7.47E-08 |
| <i>TXNIP</i>   | thioredoxin interacting protein                                                    | 1.465 | 1.04E-05 |
| <i>PMAIP1</i>  | phorbol-12-myristate-13-acetate-induced protein 1                                  | 1.426 | 1.10E-06 |
| <i>NDEL1</i>   | nudE neurodevelopment protein 1-like 1                                             | 1.422 | 4.95E-07 |
| <i>TRIB1</i>   | tribbles homolog 1 (Drosophila)                                                    | 1.394 | 7.51E-04 |
| <i>CREM</i>    | cAMP responsive element modulator                                                  | 1.390 | 1.16E-07 |
| <i>TXNIP</i>   | thioredoxin interacting protein                                                    | 1.374 | 1.31E-05 |
| <i>PDE4B</i>   | phosphodiesterase 4B, cAMP-specific                                                | 1.373 | 8.64E-08 |
| <i>MT1M</i>    | metallothionein 1M                                                                 | 1.370 | 1.61E-06 |
| <i>NR1D1</i>   | nuclear receptor subfamily 1, group D, member 1                                    | 1.364 | 1.72E-05 |
| <i>BTG1</i>    | B-cell translocation gene 1, anti-proliferative                                    | 1.361 | 1.69E-07 |
| <i>BIRC3</i>   | baculoviral IAP repeat containing 3                                                | 1.349 | 8.81E-06 |
| <i>PLK2</i>    | polo-like kinase 2                                                                 | 1.343 | 1.23E-08 |
| <i>FEM1C</i>   | fem-1 homolog c (C. elegans)                                                       | 1.334 | 9.72E-05 |
| <i>FADD</i>    | Fas (TNFRSF6)-associated via death domain                                          | 1.331 | 4.02E-07 |
| <i>MCL1</i>    | myeloid cell leukemia sequence 1 (BCL2-related)                                    | 1.330 | 1.77E-07 |
| <i>LIF</i>     | leukemia inhibitory factor                                                         | 1.326 | 3.63E-04 |
| <i>NFIL3</i>   | nuclear factor, interleukin 3 regulated                                            | 1.322 | 6.64E-05 |
| <i>LPAR6</i>   | lysophosphatidic acid receptor 6                                                   | 1.319 | 3.49E-08 |
| <i>IL10</i>    | interleukin 10                                                                     | 1.313 | 3.29E-06 |

|                  |                                                                                       |       |          |
|------------------|---------------------------------------------------------------------------------------|-------|----------|
| <i>CLDN4</i>     | claudin 4                                                                             | 1.309 | 4.82E-05 |
| <i>MMP12</i>     | matrix metalloproteinase 12 (macrophage elastase)                                     | 1.308 | 1.42E-06 |
| <i>TNFRSF12A</i> | tumor necrosis factor receptor superfamily, member 12A                                | 1.299 | 1.01E-04 |
| <i>STK17B</i>    | serine/threonine kinase 17b                                                           | 1.295 | 1.57E-05 |
| <i>SOX11</i>     | SRY (sex determining region Y)-box 11                                                 | 1.293 | 3.16E-06 |
| <i>OTUD1</i>     | OTU domain containing 1                                                               | 1.281 | 1.02E-04 |
| <i>CDKN1A</i>    | cyclin-dependent kinase inhibitor 1A (p21, Cip1)                                      | 1.277 | 6.13E-04 |
| <i>IL1RN</i>     | interleukin 1 receptor antagonist                                                     | 1.270 | 8.55E-08 |
| <i>BTG2</i>      | BTG family, member 2                                                                  | 1.267 | 7.49E-05 |
| <i>ZBTB10</i>    | zinc finger and BTB domain containing 10                                              | 1.264 | 1.54E-06 |
| <i>NR4A3</i>     | nuclear receptor subfamily 4, group A, member 3                                       | 1.245 | 2.90E-05 |
| <i>ETV3</i>      | ets variant 3                                                                         | 1.239 | 8.30E-05 |
| <i>NR0B2</i>     | nuclear receptor subfamily 0, group B, member 2                                       | 1.229 | 4.76E-05 |
| <i>C1orf116</i>  | chromosome 1 open reading frame 116                                                   | 1.229 | 2.75E-05 |
| <i>TSC22D2</i>   | TSC22 domain family, member 2                                                         | 1.228 | 1.90E-05 |
| <i>PLAU</i>      | plasminogen activator, urokinase                                                      | 1.203 | 1.49E-04 |
| <i>EDN1</i>      | endothelin 1                                                                          | 1.203 | 4.72E-04 |
| <i>NFKBIE</i>    | nuclear factor of kappa light polypeptide gene enhancer in B-cells inhibitor, epsilon | 1.198 | 2.47E-07 |
| <i>CD40</i>      | CD40 molecule, TNF receptor superfamily member 5                                      | 1.173 | 3.59E-04 |
| <i>THBD</i>      | thrombomodulin                                                                        | 1.171 | 3.11E-06 |
| <i>NR4A2</i>     | nuclear receptor subfamily 4, group A, member 2                                       | 1.165 | 8.92E-06 |
| <i>FOS</i>       | FBJ murine osteosarcoma viral oncogene homolog                                        | 1.165 | 6.78E-05 |
| <i>TBX3</i>      | T-box 3                                                                               | 1.156 | 9.31E-05 |
| <i>MMP13</i>     | matrix metalloproteinase 13 (collagenase 3)                                           | 1.151 | 2.66E-04 |
| <i>HIVEP2</i>    | human immunodeficiency virus type I enhancer binding protein 2                        | 1.150 | 1.81E-04 |
| <i>VCAM1</i>     | vascular cell adhesion molecule 1                                                     | 1.147 | 7.92E-06 |
| <i>BCL10</i>     | B-cell CLL/lymphoma 10                                                                | 1.142 | 1.33E-05 |
| <i>EEPD1</i>     | endonuclease/exonuclease/phosphatase family domain containing 1                       | 1.133 | 1.66E-05 |
| <i>PHLDA2</i>    | pleckstrin homology-like domain, family A, member 2                                   | 1.128 | 1.79E-04 |
| <i>RHPN2</i>     | rhophilin, Rho GTPase binding protein 2                                               | 1.127 | 1.51E-05 |
| <i>DUSP6</i>     | dual specificity phosphatase 6                                                        | 1.127 | 5.53E-04 |
| <i>JMJD1C</i>    | jumonji domain containing 1C                                                          | 1.121 | 1.36E-05 |
| <i>BCL6</i>      | B-cell CLL/lymphoma 6                                                                 | 1.119 | 5.51E-05 |
| <i>EVI2A</i>     | ecotropic viral integration site 2A                                                   | 1.116 | 4.09E-07 |
| <i>XCL1</i>      | chemokine (C motif) ligand 1                                                          | 1.113 | 1.07E-04 |
| <i>EFNB2</i>     | ephrin-B2                                                                             | 1.109 | 1.86E-05 |

|                                    |                                                                                   |        |          |
|------------------------------------|-----------------------------------------------------------------------------------|--------|----------|
| <i>RASGEF1A</i>                    | RasGEF domain family. member 1A                                                   | 1.103  | 1.04E-04 |
| <i>COQ10B</i>                      | coenzyme Q10 homolog B ( <i>S. cerevisiae</i> )                                   | 1.083  | 7.05E-05 |
| <i>SPRY1</i>                       | sprouty homolog 1. antagonist of FGF signaling ( <i>Drosophila</i> )              | 1.082  | 9.08E-04 |
| <i>TIMP1</i>                       | TIMP metalloproteinase inhibitor 1                                                | 1.076  | 1.68E-04 |
| <i>TRAFD1</i>                      | TRAF-type zinc finger domain containing 1                                         | 1.070  | 6.59E-06 |
| <i>CXCR4</i>                       | chemokine (C-X-C motif) receptor 4                                                | 1.065  | 3.32E-05 |
| <i>BTG3</i>                        | BTG family. member 3                                                              | 1.063  | 9.92E-04 |
| <i>KCNK5</i>                       | potassium channel. subfamily K. member 5                                          | 1.048  | 1.05E-04 |
| <i>CEBPD</i>                       | CCAAT/enhancer binding protein (C/EBP). delta                                     | 1.046  | 8.18E-05 |
| <i>RHOH</i>                        | ras homolog family member H                                                       | 1.033  | 6.14E-04 |
| <i>REL</i>                         | v-rel avian reticuloendotheliosis viral oncogene homolog                          | 1.031  | 2.86E-06 |
| <i>TIPARP</i>                      | TCDD-inducible poly(ADP-ribose) polymerase                                        | 1.027  | 3.48E-04 |
| <i>SKIL</i>                        | SKI-like oncogene                                                                 | 1.021  | 2.04E-04 |
| <i>TNFAIP2</i>                     | tumor necrosis factor. alpha-induced protein 2                                    | 1.014  | 4.77E-04 |
| <i>EGR2</i>                        | early growth response 2                                                           | 1.013  | 5.02E-05 |
| <i>ZFP36L1</i>                     | ZFP36 ring finger protein-like 1                                                  | 1.012  | 4.75E-06 |
| <b><i>Down-regulated genes</i></b> |                                                                                   |        |          |
| <i>CHAC1</i>                       | ChaC. cation transport regulator homolog 1 ( <i>E. coli</i> )                     | -1.696 | 9.18E-04 |
| <i>ABCC2</i>                       | ATP-binding cassette. sub-family C (CFTR/MRP). member 2                           | -1.015 | 2.45E-06 |
| <i>SLC15A1</i>                     | solute carrier family 15 (oligopeptide transporter). member 1                     | -0.851 | 3.56E-05 |
| <i>SLC9A2</i>                      | solute carrier family 9. subfamily A (NHE2. cation proton antiporter 2). member 2 | -0.804 | 9.09E-06 |
| <i>CCL24</i>                       | chemokine (C-C motif) ligand 24                                                   | -0.784 | 8.75E-04 |
| <i>MTPP</i>                        | microsomal triglyceride transfer protein                                          | -0.755 | 3.26E-05 |
| <i>DMBT1</i>                       | deleted in malignant brain tumors 1                                               | -0.666 | 2.67E-04 |
| <i>MLEC</i>                        | malectin                                                                          | -0.654 | 9.50E-04 |
| <i>SSH1</i>                        | slingshot protein phosphatase 1                                                   | -0.628 | 1.06E-03 |
| <i>VPS26B</i>                      | vacuolar protein sorting 26 homolog B ( <i>S. pombe</i> )                         | -0.610 | 1.04E-03 |
| <i>ACE2</i>                        | angiotensin I converting enzyme 2                                                 | -0.607 | 7.35E-04 |
| <i>SCGB2A1</i>                     | secretoglobulin. family 2A. member 1                                              | -0.594 | 2.74E-04 |
| <i>MYEOV</i>                       | myeloma overexpressed                                                             | -0.592 | 1.58E-04 |
| <i>NPR3</i>                        | natriuretic peptide receptor 3                                                    | -0.582 | 8.74E-04 |
| <i>CBL</i>                         | Cbl proto-oncogene. E3 ubiquitin protein ligase                                   | -0.574 | 3.70E-04 |
| <i>PLOD2</i>                       | procollagen-lysine. 2-oxoglutarate 5-dioxygenase 2                                | -0.547 | 3.98E-05 |
| <i>C4BPA</i>                       | complement component 4 binding protein. alpha                                     | -0.525 | 1.04E-03 |
| <i>ARHGEF37</i>                    | Rho guanine nucleotide exchange factor (GEF) 37                                   | -0.521 | 9.19E-04 |



|                 |                                                 |        |          |
|-----------------|-------------------------------------------------|--------|----------|
| <i>DESI2</i>    | desumoylating isopeptidase 2                    | -0.501 | 3.04E-04 |
| <i>STOML3</i>   | stomatin (EPB72)-like 3                         | -0.487 | 8.33E-04 |
| <i>UNC119B</i>  | unc-119 homolog B (C. elegans)                  | -0.467 | 2.42E-04 |
| <i>ZER1</i>     | zyg-11 related. cell cycle regulator            | -0.455 | 4.92E-04 |
| <i>EGLN1</i>    | egl-9 family hypoxia-inducible factor 1         | -0.443 | 2.26E-04 |
| <i>TCAP</i>     | titin-cap                                       | -0.441 | 8.90E-04 |
| <i>PECAM1</i>   | platelet/endothelial cell adhesion molecule 1   | -0.431 | 1.43E-04 |
| <i>ZCCHC14</i>  | zinc finger. CCHC domain containing 14          | -0.430 | 5.16E-04 |
| <i>GALNT4</i>   | polypeptide N-acetylgalactosaminyltransferase 4 | -0.395 | 6.91E-04 |
| <i>ANKRD13A</i> | ankyrin repeat domain 13A                       | -0.388 | 8.85E-04 |
| <i>UNC45A</i>   | unc-45 homolog A (C. elegans)                   | -0.377 | 7.64E-04 |
| <i>TPP1</i>     | tripeptidyl peptidase I                         | -0.375 | 5.37E-04 |
| <i>OSBPL7</i>   | oxysterol binding protein-like 7                | -0.349 | 1.05E-03 |
| <i>CPT1A</i>    | carnitine palmitoyltransferase 1A (liver)       | -0.339 | 6.12E-04 |
| <i>FOXK2</i>    | forkhead box K2                                 | -0.339 | 9.82E-04 |

**Part a:** Pathways up-regulated

| <b>Canonical Pathways</b>                                                                             | <b>-log<br/>(p-value)</b> | <b>Ratio</b> | <b>Molecules</b>                                                                                                                  |
|-------------------------------------------------------------------------------------------------------|---------------------------|--------------|-----------------------------------------------------------------------------------------------------------------------------------|
| Granulocyte Adhesion and Diapedesis                                                                   | 1.18E01                   | 1.1E-01      | CCL3,IL1B,MMP12,EZR,CCL20,CLDN4,CCL3L1/CCL3L3,SELE,MMP13,CXCL2,VCAM1,CXCL8,CXCR4,IL18,IL1RN,TNF,CXCR2,IL1A,CCL4,XCL1              |
| Agranulocyte Adhesion and Diapedesis                                                                  | 1.13E01                   | 1.04E-01     | CCL3,IL1B,MMP12,EZR,CCL20,CLDN4,CCL3L1/CCL3L3,SELE,MMP13,CXCL2,VCAM1,CXCL8,CXCR4,IL18,IL1RN,TNF,CXCR2,IL1A,CCL4,XCL1              |
| Glucocorticoid Receptor Signaling                                                                     | 1.11E01                   | 7.69E-02     | HSPA2,NFKB1,CCL3,CSF2,JAK2,IL1B,PLAU,SELE,NFKBIE,NFATC1,NFKBIA,VCAM1,CXCL8,FOS,IL1RN,DUSP1,SGK1,NR3C1,TNF,SMAD3,CDKN1A,IL10,FOXO3 |
| Differential Regulation of Cytokine Production in Intestinal Epithelial Cells by IL-17A and IL-17F    | 1.07E01                   | 3.91E-01     | CCL3,CSF2,IL1B,TNF,IL1A,IL17A,IL10,CCL4,IL17F                                                                                     |
| Communication between Innate and Adaptive Immune Cells                                                | 1.01E01                   | 1.25E-01     | CCR7,CCL3,CSF2,IL1B,CCL3L1/CCL3L3,CD40,CXCL8,CD83,IL18,IL1RN,TNF,IL1A,IL10,CCL4                                                   |
| Differential Regulation of Cytokine Production in Macrophages and T Helper Cells by IL-17A and IL-17F | 1.01E01                   | 4.44E-01     | CCL3,CSF2,IL1B,TNF,IL17A,IL10,CCL4,IL17F                                                                                          |
| Hepatic Fibrosis / Hepatic Stellate Cell Activation                                                   | 9.55E00                   | 1.03E-01     | CCR7,NFKB1,IL1B,EDNRB,MMP13,CD40,VCAM1,CXCL8,IFNGR1,TNF,SMAD3,IL1A,EDN1,IL4R,IL10,TIMP1                                           |
| IL-10 Signaling                                                                                       | 9.48E00                   | 1.54E-01     | FOS,IL18,NFKB1,IL1RN,IL1B,SOCS3,TNF,IL1A,IL4R,IL10,NFKBIE,NFKBIA                                                                  |
| T Helper Cell Differentiation                                                                         | 9.41E00                   | 1.67E-01     | GATA3,IFNGR1,BCL6,IL18,STAT4,TNF,ICOSLG/LOC102723996,IL17A,IL4R,IL10,CD40,IL17F                                                   |
| Atherosclerosis Signaling                                                                             | 9.4E00                    | 1.08E-01     | NFKB1,IL1B,SELE,MMP13,CD40,VCAM1,CXCL8,CXCR4,IL18,IL1RN,TNF,IL1A,F3,TNFRSF12A,PLA2G4A                                             |
| Role of Cytokines in Mediating Communication between Immune Cells                                     | 9.36E00                   | 2E-01        | IL18,IL1RN,CSF2,IL1B,TNF,IL22,IL1A,IL17A,IL10,IL17F,CXCL8                                                                         |
| TREM1 Signaling                                                                                       | 9.01E00                   | 1.47E-01     | CD83,IL18,NFKB1,CCL3,CSF2,IL1B,JAK2,TNF,IL10,CD40,CXCL8                                                                           |
| Role of Macrophages, Fibroblasts and Endothelial Cells in Rheumatoid Arthritis                        | 8.92E00                   | 6.43E-02     | NFKB1,CEBPD,CSF2,JAK2,IL1B,SOCS3,SELE,NFKBIE,MMP13,NFATC1,NFKBIA,VCAM1,CXCL8,FOS,IL18,IL1RN,CREB5,TNF,IL1A,IL17A,IL10,IRAK2       |
| TNFR1 Signaling                                                                                       | 8.83E00                   | 1.85E-01     | FOS,BIRC2,NFKB1,CYCS,TNFAIP3,TNF,FADD,NFKBIE,NFKBIA,BIRC3                                                                         |
| TNFR2 Signaling                                                                                       | 8.28E00                   | 2.35E-01     | FOS,BIRC2,NFKB1,TNFAIP3,TNF,NFKBIE,NFKBIA,BIRC3                                                                                   |

|                                                                                  |         |          |                                                                                                    |
|----------------------------------------------------------------------------------|---------|----------|----------------------------------------------------------------------------------------------------|
| Dendritic Cell Maturation                                                        | 7.97E00 | 7.58E-02 | CCR7,NFKB1,STAT4,CSF2,JAK2,IL1B,NFKBIE,CD40,NFKBIA,CD83,IL18,IL1RN,CREB5,TNF,IL1A,IL10             |
| HMGB1 Signaling                                                                  | 7.87E00 | 1.1E-01  | FOS,IFNGR1,RHOH,NFKB1,TNF,RHOB,IL1A,PLAT,SELE,RND3,VCAM1,CXCL8                                     |
| Role of Hypercytokinemia/hyperchemokine-<br>mia in the Pathogenesis of Influenza | 7.84E00 | 1.96E-01 | IL18,CCL3,IL1RN,IL1B,TNF,IL1A,IL17A,CCL4,CXCL8                                                     |
| PPAR Signaling                                                                   | 7.82E00 | 1.12E-01 | FOS,IL18,NFKB1,IL1RN,IL1B,TNF,IL1A,NFKBIE,PPARG,NFKBIA,CITED2,NR0B2                                |
| IL-6 Signaling                                                                   | 7.72E00 | 1.05E-01 | NFKB1,JAK2,IL1B,MCL1,SOCS3,NFKBIE,NFKBIA,CXCL8,FOS,IL18,IL1RN,TNF,IL1A                             |
| TWEAK Signaling                                                                  | 7.66E00 | 2.05E-01 | BIRC2,NFKB1,CYCS,TNFRSF12A,FADD,NFKBIE,NFKBIA,BIRC3                                                |
| Role of Osteoblasts, Osteoclasts and Chondrocytes<br>in Rheumatoid Arthritis     | 7.45E00 | 6.8E-02  | BIRC2,NFKB1,CSF2,IL1B,NFKBIE,BMP2,MMP13,NFATC1,NFKBIA,BIRC3,FOS,IL18,IL1RN,<br>TNF,IL1A,IL17A,IL10 |
| IL-17A Signaling in Fibroblasts                                                  | 7.44E00 | 2E-01    | FOS,NFKB1,CEBPD,IL17A,NFKBIE,NFKBIZ,NFKBIA,NFKBID                                                  |
| Altered T Cell and B Cell Signaling in Rheumatoid<br>Arthritis                   | 7.22E00 | 1.1E-01  | IL18,NFKB1,IL1RN,CSF2,IL1B,TNF,IL22,IL1A,IL17A,IL10,CD40                                           |
| p38 MAPK Signaling                                                               | 6.7E00  | 1E-01    | DUSP10,IL18,IL1RN,DUSP1,IL1B,CREB5,TNF,IL1A,H3F3A/H3F3B,FADD,IRAK2,PLA2G4A                         |
| Induction of Apoptosis by HIV1                                                   | 6.68E00 | 1.34E-01 | BIRC2,CXCR4,NFKB1,CYCS,TNF,FADD,NFKBIE,NFKBIA,BIRC3                                                |
| iNOS Signaling                                                                   | 6.61E00 | 1.51E-01 | FOS,IRF1,IFNGR1,NFKB1,JAK2,NFKBIE,IRAK2,NFKBIA                                                     |
| Role of IL-17F in Allergic Inflammatory Airway<br>Diseases                       | 6.53E00 | 1.67E-01 | NFKB1,CSF2,IL1B,CREB5,CCL4,MMP13,IL17F,CXCL8                                                       |
| NF-κB Signaling                                                                  | 6.48E00 | 7.73E-02 | NFKB1,IL1B,BMP2,NFKBIE,FADD,CD40,NFKBIA,PELI1,IL18,IL1RN,TNFAIP3,BCL10,TNF,IL1A                    |
| Type I Diabetes Mellitus Signaling                                               | 6.2E00  | 9.09E-02 | IRF1,IFNGR1,NFKB1,CYCS,IL1B,JAK2,SOCS3,TNF,FADD,NFKBIE,NFKBIA                                      |
| IL-17A Signaling in Gastric Cells                                                | 5.84E00 | 2.14E-01 | FOS,NFKB1,TNF,CCL20,IL17A,CXCL8                                                                    |
| Acute Phase Response Signaling                                                   | 5.81E00 | 7.18E-02 | NFKB1,JAK2,IL1B,SOCS3,NFKBIE,NFKBIA,FOS,IL18,IL1RN,NR3C1,TNF,IL1A,HAMP                             |
| Role of PKR in Interferon Induction and Antiviral<br>Response                    | 5.73E00 | 1.43E-01 | IRF1,NFKB1,CYCS,TNF,FADD,NFKBIE,NFKBIA                                                             |
| Death Receptor Signaling                                                         | 5.66E00 | 1.18E-01 | BIRC2,NFKB1,CYCS,TNF,FADD,NFKBIE,NFKBIA,BIRC3                                                      |
| Cholecystokinin/Gastrin-mediated Signaling                                       | 5.57E00 | 9.43E-02 | FOS,RHOH,IL18,CREM,IL1RN,IL1B,TNF,RHOB,IL1A,RND3                                                   |
| Activation of IRF by Cytosolic Pattern Recognition<br>Receptors                  | 5.38E00 | 1.08E-01 | NFKB1,TNF,IFIH1,IL10,FADD,CD40,NFKBIE,NFKBIA                                                       |
| IL-12 Signaling and Production in Macrophages                                    | 5.27E00 | 7.01E-02 | FOS,REL,IRF1,IFNGR1,IL18,NFKB1,STAT4,TNF,IL10,CD40,PPARG                                           |
| Apoptosis Signaling                                                              | 5.19E00 | 9E-02    | BIRC2,NFKB1,CYCS,MCL1,BCL2A1,TNF,NFKBIE,NFKBIA,BIRC3                                               |
| Hepatic Cholestasis                                                              | 5.12E00 | 6.01E-02 | IL18,NFKB1,IL1RN,IL1B,TNF,IL1A,NFKBIE,IRAK2,NFKBIA,CXCL8,NR0B2                                     |
| Role of IL-17A in Arthritis                                                      | 4.83E00 | 1.09E-01 | NFKB1,CCL20,IL17A,NFKBIE,MMP13,NFKBIA,CXCL8                                                        |
| PI3K Signaling in B Lymphocytes                                                  | 4.65E00 | 6.99E-02 | FOS,NFKB1,BCL10,IL4R,CD40,NFKBIE,NFKBIA,NFATC1,FOXO3,ATF3                                          |
| Glioma Invasiveness Signaling                                                    | 4.62E00 | 1.06E-01 | RHOH,ITGAV,PLAU,RHOB,PLAUR,TIMP1,RND3                                                              |
| IL-8 Signaling                                                                   | 4.6E00  | 5.33E-02 | FOS,HBEGF,RHOH,NFKB1,ANGPT2,ITGAV,RHOB,CXCR2,IRAK2,RND3,VCAM1,CXCL8                                |

|                                                                       |         |          |                                                                                            |
|-----------------------------------------------------------------------|---------|----------|--------------------------------------------------------------------------------------------|
| Role of Tissue Factor in Cancer                                       | 4.37E00 | 6.92E-02 | HBEGF,CSF2,ITGAV,IL1B,JAK2,PLAUR,F3,MMP13,CXCL8                                            |
| ERK5 Signaling                                                        | 4.34E00 | 1.03E-01 | FOS,CREB5,SGK1,LIF,FOXO3,FOSL1,SH2D2A                                                      |
| Molecular Mechanisms of Cancer                                        | 4.23E00 | 4.12E-02 | BIRC2,RHOH,NFKB1,JAK2,BMP2,NFKBIE,FADD,NFKBIA,BIRC3,FOS,CYCS,SMAD3,RHOB,CDKN1A,RND3,PMAIP1 |
| Crosstalk between Dendritic Cells and Natural Killer Cells            | 4.23E00 | 7.55E-02 | CCR7,CD83,IL18,NFKB1,CSF2,TNF,CD40,CD69                                                    |
| Production of Nitric Oxide and Reactive Oxygen Species in Macrophages | 4.1E00  | 5.19E-02 | FOS,IRF1,IFNGR1,RHOH,NFKB1,JAK2,TNF,RHOB,NFKBIE,NFKBIA,RND3                                |
| MIF-mediated Glucocorticoid Regulation                                | 3.92E00 | 1.19E-01 | NFKB1,NR3C1,NFKBIE,NFKBIA,PLA2G4A                                                          |
| ERK/MAPK Signaling                                                    | 3.91E00 | 5.21E-02 | FOS,DUSP1,CREB5,H3F3A/H3F3B,DUSP6,ETS1,PPARG,ELF3,NFATC1,PLA2G4A,ETS2                      |
| Lymphotoxin $\beta$ Receptor Signaling                                | 3.83E00 | 9.68E-02 | BIRC2,NFKB1,CYCS,NFKBIA,NFKBID,VCAM1                                                       |
| Coagulation System                                                    | 3.8E00  | 1.32E-01 | PLAU,THBD,PLAUR,F3,PLAT                                                                    |
| Regulation of IL-2 Expression in Activated and Anergic T Lymphocytes  | 3.76E00 | 7.87E-02 | FOS,NFKB1,BCL10,SMAD3,NFKBIE,NFKBIA,NFATC1                                                 |
| GADD45 Signaling                                                      | 3.71E00 | 1.67E-01 | CDKN1A,GADD45B,GADD45A,GADD45G                                                             |
| April Mediated Signaling                                              | 3.62E00 | 1.14E-01 | FOS,NFKB1,NFKBIE,NFKBIA,NFATC1                                                             |
| ATM Signaling                                                         | 3.58E00 | 9.09E-02 | CREB5,CDKN1A,GADD45B,GADD45A,NFKBIA,GADD45G                                                |
| FXR/RXR Activation                                                    | 3.53E00 | 6.36E-02 | IL18,IL1RN,IL1B,TNF,IL1A,PPARG,NR0B2                                                       |
| B Cell Activating Factor Signaling                                    | 3.52E00 | 1.09E-01 | FOS,NFKB1,NFKBIE,NFKBIA,NFATC1                                                             |
| RANK Signaling in Osteoclasts                                         | 3.49E00 | 7.22E-02 | FOS,BIRC2,NFKB1,NFKBIE,NFKBIA,NFATC1,BIRC3                                                 |
| MIF Regulation of Innate Immunity                                     | 3.47E00 | 9.62E-02 | FOS,NFKB1,NFKBIE,NFKBIA,PLA2G4A                                                            |
| CD40 Signaling                                                        | 3.46E00 | 8.45E-02 | FOS,NFKB1,TNFAIP3,CD40,NFKBIE,NFKBIA                                                       |
| IL-17A Signaling in Airway Cells                                      | 3.42E00 | 7.89E-02 | NFKB1,JAK2,CCL20,IL17A,NFKBIE,NFKBIA                                                       |
| Role of RIG1-like Receptors in Antiviral Innate Immunity              | 3.32E00 | 1.02E-01 | NFKB1,IFIH1,FADD,NFKBIE,NFKBIA                                                             |
| Erythropoietin Signaling                                              | 3.32E00 | 7.59E-02 | FOS,NFKB1,JAK2,SOCS3,NFKBIE,NFKBIA                                                         |
| PI3K/AKT Signaling                                                    | 3.29E00 | 5.26E-02 | NFKB1,JAK2,MCL1,CDKN1A,NOS3,NFKBIE,NFKBIA,FOXO3                                            |
| Tec Kinase Signaling                                                  | 3.25E00 | 4.89E-02 | FOS,RHOH,NFKB1,STAT4,JAK2,TNF,RHOB,FADD,RND3                                               |
| Graft-versus-Host Disease Signaling                                   | 3.23E00 | 9.8E-02  | IL18,IL1RN,IL1B,TNF,IL1A                                                                   |
| Antioxidant Action of Vitamin C                                       | 3.21E00 | 6.31E-02 | NFKB1,CSF2,JAK2,TNF,NFKBIE,NFKBIA,PLA2G4A                                                  |
| B Cell Receptor Signaling                                             | 3.19E00 | 5.14E-02 | BCL6,NFKB1,BCL10,CREB5,BCL2A1,ETS1,NFKBIE,NFKBIA,NFATC1                                    |
| IL-17 Signaling                                                       | 3.15E00 | 8E-02    | NFKB1,JAK2,IL17A,TIMP1,IL17F,CXCL8                                                         |
| Role of IL-17A in Psoriasis                                           | 3.08E00 | 2.14E-01 | CCL20,IL17A,CXCL8                                                                          |
| CD27 Signaling in Lymphocytes                                         | 3.02E00 | 8.47E-02 | FOS,NFKB1,CYCS,NFKBIE,NFKBIA                                                               |
| Hematopoiesis from Pluripotent Stem Cells                             | 3.02E00 | 7.94E-02 | CSF2,IL1A,LIF,IL10,CXCL8                                                                   |
| Colorectal Cancer Metastasis Signaling                                | 2.98E00 | 4.1E-02  | FOS,IFNGR1,RHOH,NFKB1,JAK2,TNF,RHOB,SMAD3,MMP12,MMP13,RND3                                 |

|                                                           |         |          |                                                                                                         |
|-----------------------------------------------------------|---------|----------|---------------------------------------------------------------------------------------------------------|
| VDR/RXR Activation                                        | 2.96E00 | 6.82E-02 | CSF2, THBD, CDKN1A, MXD1, GADD45A, KLF4                                                                 |
| 4-1BB Signaling in T Lymphocytes                          | 2.96E00 | 1.11E-01 | NFKB1, TNFRSF9, NFKBIE, NFKBIA                                                                          |
| Toll-like Receptor Signaling                              | 2.84E00 | 7.81E-02 | FOS, NFKB1, TNFAIP3, IRAK2, NFKBIA                                                                      |
| Gαq Signaling                                             | 2.76E00 | 4.68E-02 | RHOH, NFKB1, RHOB, RGS2, NFKBIE, NFKBIA, NFATC1, RND3                                                   |
| Type II Diabetes Mellitus Signaling                       | 2.75E00 | 4.09E-02 | ACSL4, NFKB1, SOCS3, TNF, NFKBIE, PPARG, NFKBIA                                                         |
| Protein Kinase A Signaling                                | 2.73E00 | 3.42E-02 | DUSP10, NFKB1, H3F3A/H3F3B, NFKBIE, PDE4B, H1F0, NFATC1, NFKBIA, CREM, CREB5, DUSP1, SMAD3, DUSP6, NOS3 |
| Systemic Lupus Erythematosus Signaling                    | 2.71E00 | 3.91E-02 | FOS, IL18, CREM, IL1RN, IL1B, TNF, IL1A, IL10, CD40, NFATC1                                             |
| ILK Signaling                                             | 2.7E00  | 4.39E-02 | FOS, RHOH, NFKB1, CREB5, SNAI2, TNF, RHOB, BMP2, RND3                                                   |
| IL-1 Signaling                                            | 2.57E00 | 5.5E-02  | FOS, NFKB1, IL1A, NFKBIE, IRAK2, NFKBIA                                                                 |
| Angiopoietin Signaling                                    | 2.55E00 | 6.67E-02 | NFKB1, ANGPT2, NOS3, NFKBIE, NFKBIA                                                                     |
| Hypoxia Signaling in the Cardiovascular System            | 2.52E00 | 7.35E-02 | CREB5, EDN1, NOS3, NFKBIE, NFKBIA                                                                       |
| JAK/Stat Signaling                                        | 2.49E00 | 7.04E-02 | FOS, STAT4, JAK2, SOCS3, CDKN1A                                                                         |
| Neurotrophin/TRK Signaling                                | 2.46E00 | 6.58E-02 | FOS, CREB5, SPRY2, SPRY1, BDNF                                                                          |
| p53 Signaling                                             | 2.46E00 | 5.31E-02 | SNAI2, CDKN1A, GADD45B, GADD45A, PMAIP1, GADD45G                                                        |
| Small Cell Lung Cancer Signaling                          | 2.38E00 | 5.32E-02 | BIRC2, NFKB1, CYCS, NFKBIE, NFKBIA                                                                      |
| PEDF Signaling                                            | 2.38E00 | 6.33E-02 | NFKB1, NFKBIE, PPARG, NFKBIA, BDNF                                                                      |
| Prolactin Signaling                                       | 2.33E00 | 5.95E-02 | FOS, IRF1, JAK2, SOCS3, NR3C1                                                                           |
| Aryl Hydrocarbon Receptor Signaling                       | 2.3E00  | 4.09E-02 | FOS, NFKB1, IL1B, TNF, IL1A, CDKN1A, NR0B2                                                              |
| RAR Activation                                            | 2.29E00 | 4.1E-02  | FOS, REL, NFKB1, DUSP1, JAK2, SMAD3, BMP2, CITED2                                                       |
| Role of JAK1, JAK2 and TYK2 in Interferon Signaling       | 2.28E00 | 1.07E-01 | IFNGR1, NFKB1, JAK2                                                                                     |
| iCOS-iCOSL Signaling in T Helper Cells                    | 2.27E00 | 4.76E-02 | NFKB1, ICOSLG/LOC102723996, CD40, NFKBIE, NFKBIA, NFATC1                                                |
| G-Protein Coupled Receptor Signaling                      | 2.26E00 | 3.62E-02 | NFKB1, DUSP1, CREB5, CXCR2, RGS2, ADORA3, DUSP6, NFKBIE, PDE4B, NFKBIA                                  |
| Airway Pathology in Chronic Obstructive Pulmonary Disease | 2.23E00 | 1.82E-01 | TNF, CXCL8                                                                                              |
| IL-15 Production                                          | 2.13E00 | 9.68E-02 | IRF1, NFKB1, JAK2                                                                                       |
| Pathogenesis of Multiple Sclerosis                        | 2.13E00 | 2E-01    | CCL3, CCL4                                                                                              |
| Semaphorin Signaling in Neurons                           | 2.13E00 | 7.41E-02 | RHOH, RHOB, RND3, RND1                                                                                  |
| CD28 Signaling in T Helper Cells                          | 2.1E00  | 4.41E-02 | FOS, NFKB1, BCL10, NFKBIE, NFKBIA, NFATC1                                                               |
| PKCθ Signaling in T Lymphocytes                           | 2.1E00  | 4.17E-02 | FOS, NFKB1, BCL10, NFKBIE, NFKBIA, NFATC1                                                               |
| Prostate Cancer Signaling                                 | 2.1E00  | 4.85E-02 | NFKB1, CREB5, CDKN1A, NFKBIE, NFKBIA                                                                    |
| LXR/RXR Activation                                        | 2.02E00 | 4.32E-02 | IL18, NFKB1, IL1RN, IL1B, TNF, IL1A                                                                     |
| TGF-β Signaling                                           | 2.01E00 | 5.32E-02 | FOS, INHBA, SMAD3, PMEPA1, BMP2                                                                         |
| Leukocyte Extravasation Signaling                         | 2.01E00 | 3.81E-02 | RHOH, CXCR4, MMP12, EZR, CLDN4, TIMP1, MMP13, VCAM1                                                     |

|                                                                              |         |          |                                                |
|------------------------------------------------------------------------------|---------|----------|------------------------------------------------|
| IL-15 Signaling                                                              | 1.89E00 | 5.56E-02 | NFKB1,CSF2,JAK2,IL17A                          |
| SAPK/JNK Signaling                                                           | 1.86E00 | 4.76E-02 | DUSP10,GADD45A,FADD,NFATC1,SH2D2A              |
| Circadian Rhythm Signaling                                                   | 1.86E00 | 7.89E-02 | BHLHE40,CREB5,NR1D1                            |
| IL-9 Signaling                                                               | 1.86E00 | 7.5E-02  | NFKB1,SOCS3,TNF                                |
| Oncostatin M Signaling                                                       | 1.86E00 | 8.57E-02 | JAK2,PLAU,MMP13                                |
| Interferon Signaling                                                         | 1.86E00 | 8.33E-02 | IRF1,IFNGR1,JAK2                               |
| Role of Pattern Recognition Receptors in Recognition of Bacteria and Viruses | 1.84E00 | 4.59E-02 | NFKB1,IL1B,TNF,IFIH1,IL10                      |
| GM-CSF Signaling                                                             | 1.84E00 | 5.88E-02 | CSF2,JAK2,BCL2A1,ETS1                          |
| T Cell Receptor Signaling                                                    | 1.82E00 | 4.59E-02 | FOS,NFKB1,BCL10,NFKBIA,NFATC1                  |
| Relaxin Signaling                                                            | 1.77E00 | 3.66E-02 | FOS,NFKB1,NOS3,NFKBIE,PDE4B,NFKBIA             |
| HGF Signaling                                                                | 1.77E00 | 4.5E-02  | FOS,CDKN1A,ETS1,ELF3,ETS2                      |
| PPAR $\alpha$ /RXR $\alpha$ Activation                                       | 1.77E00 | 3.5E-02  | NFKB1,IL1B,JAK2,SMAD3,NFKBIE,NFKBIA,NR0B2      |
| cAMP-mediated signaling                                                      | 1.75E00 | 3.54E-02 | CREM,DUSP1,CREB5,CXCR2,RGS2,ADORA3,DUSP6,PDE4B |
| PXR/RXR Activation                                                           | 1.75E00 | 4.35E-02 | NR3C1,TNF,FOXO3,NR0B2                          |
| Retinoic acid Mediated Apoptosis Signaling                                   | 1.75E00 | 5.48E-02 | TIPARP,IRF1,CYCS,FADD                          |
| LPS/IL-1 Mediated Inhibition of RXR Function                                 | 1.74E00 | 3.27E-02 | ACSL4,IL18,IL1RN,IL1B,TNF,IL1A,SMOX,NR0B2      |
| Docosahexaenoic Acid (DHA) Signaling                                         | 1.7E00  | 6E-02    | CYCS,IL1B,BCL2A1                               |
| Inhibition of Matrix Metalloproteases                                        | 1.7E00  | 7.5E-02  | MMP12,TIMP1,MMP13                              |
| Pancreatic Adenocarcinoma Signaling                                          | 1.66E00 | 3.91E-02 | HBEGF,NFKB1,JAK2,SMAD3,CDKN1A                  |
| Extrinsic Prothrombin Activation Pathway                                     | 1.64E00 | 9.09E-02 | THBD,F3                                        |
| LPS-stimulated MAPK Signaling                                                | 1.63E00 | 4.82E-02 | FOS,NFKB1,NFKBIE,NFKBIA                        |
| NF- $\kappa$ B Activation by Viruses                                         | 1.61E00 | 4.82E-02 | NFKB1,ITGAV,NFKBIE,NFKBIA                      |
| IL-4 Signaling                                                               | 1.61E00 | 5E-02    | JAK2,NR3C1,IL4R,NFATC1                         |
| Corticotropin Releasing Hormone Signaling                                    | 1.57E00 | 3.45E-02 | FOS,JUND,CREB5,NOS3,BDNF                       |
| Integrin Signaling                                                           | 1.54E00 | 3.37E-02 | RHOH,ITGAV,RHOB,NEDD9,BCAR3,ARF6,RND3          |
| Thiosulfate Disproportionation III (Rhodanese)                               | 1.53E00 | 1.67E-01 | MOCS3                                          |
| Ceramide Signaling                                                           | 1.5E00  | 4.4E-02  | FOS,NFKB1,CYCS,TNF                             |
| Polyamine Regulation in Colon Cancer                                         | 1.38E00 | 6.67E-02 | MXD1,PPARG                                     |
| Role of NFAT in Regulation of the Immune Response                            | 1.36E00 | 3E-02    | FOS,NFKB1,RCAN1,NFKBIE,NFKBIA,NFATC1           |
| Bladder Cancer Signaling                                                     | 1.36E00 | 4.12E-02 | MMP12,CDKN1A,MMP13,CXCL8                       |
| IL-22 Signaling                                                              | 1.31E00 | 8E-02    | SOCS3,IL22                                     |
| Tumoricidal Function of Hepatic Natural Killer Cells                         | 1.31E00 | 7.41E-02 | CYCS,FADD                                      |
| Actin Nucleation by ARP-WASP Complex                                         | 1.29E00 | 4.48E-02 | RHOH,RHOB,RND3                                 |

|                                                             |          |          |                                           |
|-------------------------------------------------------------|----------|----------|-------------------------------------------|
| Role of JAK family kinases in IL-6-type Cytokine Signaling  | 1.28E00  | 7.14E-02 | JAK2,SOCS3                                |
| Regulation of the Epithelial-Mesenchymal Transition Pathway | 1.27E00  | 3.06E-02 | NFKB1,JAK2,ID2,SNAI2,SMAD3,ETS1           |
| IGF-1 Signaling                                             | 1.24E00  | 3.74E-02 | FOS,JAK2,SOCS3,FOXO3                      |
| Airway Inflammation in Asthma                               | 1.23E00  | 1.67E-01 | TNF                                       |
| Spermine and Spermidine Degradation I                       | 1.23E00  | 7.14E-02 | SMOX                                      |
| Melatonin Degradation II                                    | 1.23E00  | 8.33E-02 | SMOX                                      |
| Molybdenum Cofactor Biosynthesis                            | 1.23E00  | 6.25E-02 | MOCS3                                     |
| Phospholipase C Signaling                                   | 1.21E00  | 2.64E-02 | RHOH,NFKB1,CREB5,RHOB,NFATC1,PLA2G4A,RND3 |
| Telomerase Signaling                                        | 1.19E00  | 3.77E-02 | CDKN1A,ETS1,ELF3,ETS2                     |
| Role of JAK1 and JAK3 in $\gamma$ c Cytokine Signaling      | 1.19E00  | 4.41E-02 | JAK2,SOCS3,IL4R                           |
| Estrogen-Dependent Breast Cancer Signaling                  | 1.17E00  | 4.11E-02 | FOS,NFKB1,CREB5                           |
| HIF1 $\alpha$ Signaling                                     | 1.17E00  | 3.57E-02 | MMP12,EDN1,NOS3,MMP13                     |
| Tetrahydrofolate Salvage from 5,10-methenyltetrahydrofolate | 1.14E00  | 1E-01    | MTHFD1L                                   |
| Citrulline-Nitric Oxide Cycle                               | 1.14E00  | 6.25E-02 | NOS3                                      |
| Role of PI3K/AKT Signaling in the Pathogenesis of Influenza | 1.14E00  | 3.95E-02 | NFKB1,NFKBIE,NFKBIA                       |
| Tight Junction Signaling                                    | 1.1E00   | 2.99E-02 | FOS,NFKB1,MPP5,TNF,CLDN4                  |
| CXCR4 Signaling                                             | 1.1E00   | 2.87E-02 | FOS,RHOH,CXCR4,RHOB,RND3                  |
| fMLP Signaling in Neutrophils                               | 1.1E00   | 3.03E-02 | NFKB1,NFKBIE,NFKBIA,NFATC1                |
| Renin-Angiotensin Signaling                                 | 1.1E00   | 3.17E-02 | FOS,NFKB1,JAK2,TNF                        |
| Growth Hormone Signaling                                    | 1.08E00  | 3.85E-02 | FOS,JAK2,SOCS3                            |
| Chemokine Signaling                                         | 1.08E00  | 4E-02    | FOS,CXCR4,CCL4                            |
| CCR5 Signaling in Macrophages                               | 1.06E00  | 3.09E-02 | FOS,CCL3,CCL4                             |
| Role of JAK2 in Hormone-like Cytokine Signaling             | 1.04E00  | 5.41E-02 | JAK2,SOCS3                                |
| STAT3 Pathway                                               | 1.02E00  | 3.75E-02 | JAK2,SOCS3,CDKN1A                         |
| Hereditary Breast Cancer Signaling                          | 1.02E00  | 2.99E-02 | CDKN1A,GADD45B,GADD45A,GADD45G            |
| Cell Cycle Regulation by BTG Family Proteins                | 1.02E00  | 5.13E-02 | BTG1,BTG2                                 |
| Folate Polyglutamylation                                    | 1E00     | 5E-02    | MTHFD1L                                   |
| G $\alpha$ 12/13 Signaling                                  | 1E00     | 3.15E-02 | LPAR6,NFKB1,NFKBIE,NFKBIA                 |
| RhoA Signaling                                              | 1E00     | 3.25E-02 | LPAR6,EZR,RHPN2,RND3                      |
| VEGF Family Ligand-Receptor Interactions                    | 9.81E-01 | 3.41E-02 | FOS,NOS3,PLA2G4A                          |
| BMP signaling pathway                                       | 9.81E-01 | 3.49E-02 | NFKB1,FST,BMP2                            |
| Histidine Degradation III                                   | 9.46E-01 | 5.56E-02 | MTHFD1L                                   |

|                                                                  |          |          |                                                       |
|------------------------------------------------------------------|----------|----------|-------------------------------------------------------|
| Tryptophan Degradation to 2-amino-3-carboxymuconate Semialdehyde | 9.46E-01 | 5.56E-02 | IDO1                                                  |
| Endothelin-1 Signaling                                           | 9.39E-01 | 2.6E-02  | FOS,EDN1,EDNRB,NOS3,PLA2G4A                           |
| Thyroid Cancer Signaling                                         | 9.23E-01 | 4.55E-02 | PPARG,BDNF                                            |
| Ephrin Receptor Signaling                                        | 9.16E-01 | 2.38E-02 | EFNB2,CXCR4,JAK2,CREB5,EPHA2                          |
| Regulation of Actin-based Motility by Rho                        | 8.96E-01 | 3.26E-02 | RHOH,RHOB,RND3                                        |
| Allograft Rejection Signaling                                    | 8.96E-01 | 3.09E-02 | TNF,IL10,CD40                                         |
| Signaling by Rho Family GTPases                                  | 8.79E-01 | 2.28E-02 | FOS,RHOH,NFKB1,RHOB,EZR,RND3                          |
| ErbB Signaling                                                   | 8.74E-01 | 3.33E-02 | FOS,HBEGF,AREG                                        |
| Insulin Receptor Signaling                                       | 8.7E-01  | 2.68E-02 | JAK2,SOCS3,SGK1,FOXO3                                 |
| OX40 Signaling Pathway                                           | 8.63E-01 | 3.09E-02 | NFKB1,NFKBIE,NFKBIA                                   |
| Folate Transformations I                                         | 8.55E-01 | 3.03E-02 | MTHFD1L                                               |
| Cell Cycle: G2/M DNA Damage Checkpoint Regulation                | 8.55E-01 | 4.08E-02 | CDKN1A,GADD45A                                        |
| Human Embryonic Stem Cell Pluripotency                           | 8.44E-01 | 2.47E-02 | INHBA,SMAD3,BMP2,BDNF                                 |
| MSP-RON Signaling Pathway                                        | 8.39E-01 | 3.92E-02 | JAK2,TNF                                              |
| UVA-Induced MAPK Signaling                                       | 8.11E-01 | 3.06E-02 | FOS,TIPARP,CYCS                                       |
| Autoimmune Thyroid Disease Signaling                             | 8.09E-01 | 3.23E-02 | IL10,CD40                                             |
| Thrombin Signaling                                               | 8.03E-01 | 2.37E-02 | GATA3,RHOH,NFKB1,RHOB,RND3                            |
| VEGF Signaling                                                   | 8.01E-01 | 2.75E-02 | NOS3,FOXO3,SH2D2A                                     |
| Fcγ Receptor-mediated Phagocytosis in Macrophages and Monocytes  | 7.91E-01 | 2.83E-02 | CSF2,EZR,ARF6                                         |
| Hematopoiesis from Multipotent Stem Cells                        | 7.83E-01 | 8.33E-02 | CSF2                                                  |
| Chronic Myeloid Leukemia Signaling                               | 7.82E-01 | 2.83E-02 | NFKB1,SMAD3,CDKN1A                                    |
| Mouse Embryonic Stem Cell Pluripotency                           | 7.72E-01 | 3.03E-02 | JAK2,ID2,LIF                                          |
| Glioblastoma Multiforme Signaling                                | 7.52E-01 | 2.38E-02 | RHOH,RHOB,CDKN1A,RND3                                 |
| Fatty Acid Activation                                            | 7.51E-01 | 5.26E-02 | ACSL4                                                 |
| Amyotrophic Lateral Sclerosis Signaling                          | 7.36E-01 | 2.38E-02 | BIRC2,CYCS,BIRC3                                      |
| UVB-Induced MAPK Signaling                                       | 7.28E-01 | 3.45E-02 | FOS,H3F3A/H3F3B                                       |
| Superpathway of Citrulline Metabolism                            | 7.22E-01 | 2.63E-02 | NOS3                                                  |
| Phenylalanine Degradation IV (Mammalian, via Side Chain)         | 7.22E-01 | 2.56E-02 | SMOX                                                  |
| Thrombopoietin Signaling                                         | 7.04E-01 | 3.12E-02 | FOS,JAK2                                              |
| Nur77 Signaling in T Lymphocytes                                 | 7.04E-01 | 3.12E-02 | CYCS,NFATC1                                           |
| Axonal Guidance Signaling                                        | 7E-01    | 1.85E-02 | EFNB2,CXCR4,BMP2,MMP13,EPHA2,NFATC1,BDNF,RND1,ADAMTS1 |



|                                                              |          |          |                                 |
|--------------------------------------------------------------|----------|----------|---------------------------------|
| NAD biosynthesis II (from tryptophan)                        | 6.95E-01 | 2.86E-02 | IDO1                            |
| Germ Cell-Sertoli Cell Junction Signaling                    | 6.9E-01  | 2.37E-02 | RHOH,TNF,RHOB,RND3              |
| Granzyme B Signaling                                         | 6.7E-01  | 5.56E-02 | CYCS                            |
| Parkinson's Signaling                                        | 6.7E-01  | 5.26E-02 | CYCS                            |
| Myc Mediated Apoptosis Signaling                             | 6.69E-01 | 3.17E-02 | CYCS,FADD                       |
| Xenobiotic Metabolism Signaling                              | 6.6E-01  | 2.08E-02 | NFKB1,IL1B,TNF,IL1A,SMOX,CITED2 |
| Fc Epsilon RI Signaling                                      | 6.54E-01 | 2.56E-02 | CSF2,TNF,PLA2G4A                |
| Role of BRCA1 in DNA Damage Response                         | 6.48E-01 | 2.82E-02 | CDKN1A,GADD45A                  |
| $\gamma$ -linolenate Biosynthesis II (Animals)               | 6.47E-01 | 4.17E-02 | ACSL4                           |
| Mitochondrial L-carnitine Shuttle Pathway                    | 6.47E-01 | 4.55E-02 | ACSL4                           |
| Putrescine Degradation III                                   | 6.47E-01 | 3.33E-02 | SMOX                            |
| Sphingosine-1-phosphate Signaling                            | 6.46E-01 | 2.44E-02 | RHOH,RHOB,RND3                  |
| Role of NANOG in Mammalian Embryonic Stem Cell Pluripotency  | 6.31E-01 | 2.52E-02 | JAK2,LIF,BMP2                   |
| Tryptophan Degradation X (Mammalian, via Tryptamine)         | 6.25E-01 | 3.45E-02 | SMOX                            |
| Huntington's Disease Signaling                               | 6.2E-01  | 1.98E-02 | HSPA2,CYCS,CREB5,SGK1,BDNF      |
| Cardiomyocyte Differentiation via BMP Receptors              | 6.05E-01 | 4.55E-02 | BMP2                            |
| Granzyme A Signaling                                         | 6.05E-01 | 5E-02    | H1FO                            |
| 1D-myo-inositol Hexakisphosphate Biosynthesis II (Mammalian) | 6.05E-01 | 3.57E-02 | ITPKC                           |
| D-myo-inositol (1,3,4)-trisphosphate Biosynthesis            | 6.05E-01 | 4E-02    | ITPKC                           |
| PTEN Signaling                                               | 5.96E-01 | 2.17E-02 | NFKB1,CDKN1A,FOXO3              |
| Cell Cycle: G1/S Checkpoint Regulation                       | 5.88E-01 | 2.78E-02 | SMAD3,CDKN1A                    |
| DNA Methylation and Transcriptional Repression Signaling     | 5.86E-01 | 4.35E-02 | ARID4B                          |
| RhoGDI Signaling                                             | 5.82E-01 | 1.98E-02 | RHOH,RHOB,EZR,RND3              |
| Role of MAPK Signaling in the Pathogenesis of Influenza      | 5.7E-01  | 2.78E-02 | TNF,PLA2G4A                     |
| Tryptophan Degradation III (Eukaryotic)                      | 5.68E-01 | 2.08E-02 | IDO1                            |
| P2Y Purigenic Receptor Signaling Pathway                     | 5.63E-01 | 2.08E-02 | FOS,NFKB1,CREB5                 |
| D-myo-inositol (1,4,5,6)-Tetrakisphosphate Biosynthesis      | 5.56E-01 | 2.08E-02 | DUSP10,DUSP1,SOCS3              |
| D-myo-inositol (3,4,5,6)-tetrakisphosphate Biosynthesis      | 5.56E-01 | 2.08E-02 | DUSP10,DUSP1,SOCS3              |
| Renal Cell Carcinoma Signaling                               | 5.52E-01 | 2.53E-02 | FOS,ETS1                        |

|                                                                |          |          |                          |
|----------------------------------------------------------------|----------|----------|--------------------------|
| NRF2-mediated Oxidative Stress Response                        | 5.51E-01 | 2.05E-02 | FOS,JUND,FOSL1,ENC1      |
| IL-3 Signaling                                                 | 5.44E-01 | 2.67E-02 | FOS,JAK2                 |
| Estrogen Receptor Signaling                                    | 5.32E-01 | 2.21E-02 | NR3C1,H3F3A/H3F3B,NR0B2  |
| Ephrin B Signaling                                             | 5.19E-01 | 2.44E-02 | EFNB2,CXCR4              |
| Estrogen-mediated S-phase Entry                                | 5.19E-01 | 3.57E-02 | CDKN1A                   |
| Dopamine Degradation                                           | 5.19E-01 | 2.63E-02 | SMOX                     |
| Superpathway of D-myo-inositol (1,4,5)-triphosphate Metabolism | 5.19E-01 | 3.03E-02 | ITPKC                    |
| GNRH Signaling                                                 | 5.14E-01 | 1.96E-02 | FOS,NFKB1,CREB5          |
| FLT3 Signaling in Hematopoietic Progenitor Cells               | 5.12E-01 | 2.53E-02 | STAT4,CREB5              |
| Leptin Signaling in Obesity                                    | 5.12E-01 | 2.35E-02 | JAK2,SOCS3               |
| eNOS Signaling                                                 | 5.08E-01 | 1.94E-02 | HSPA2,LPAR6,NOS3         |
| HER-2 Signaling in Breast Cancer                               | 5.04E-01 | 2.44E-02 | AREG,CDKN1A              |
| Superpathway of Inositol Phosphate Compounds                   | 5.02E-01 | 1.71E-02 | DUSP10,DUSP1,SOCS3,ITPKC |
| PDGF Signaling                                                 | 4.96E-01 | 2.33E-02 | FOS,JAK2                 |
| Lipid Antigen Presentation by CD1                              | 4.9E-01  | 3.33E-02 | ARF6                     |
| Antiproliferative Role of TOB in T Cell Signaling              | 4.9E-01  | 3.85E-02 | SMAD3                    |
| Cytotoxic T Lymphocyte-mediated Apoptosis of Target Cells      | 4.68E-01 | 2.27E-02 | CYCS,FADD                |
| Intrinsic Prothrombin Activation Pathway                       | 4.64E-01 | 2.7E-02  | THBD                     |
| Pyrimidine Ribonucleotides Interconversion                     | 4.64E-01 | 2.5E-02  | ENTPD7                   |
| D-myo-inositol-5-phosphate Metabolism                          | 4.6E-01  | 1.85E-02 | DUSP10,DUSP1,SOCS3       |
| 3-phosphoinositide Degradation                                 | 4.6E-01  | 1.85E-02 | DUSP10,DUSP1,SOCS3       |
| Pyrimidine Ribonucleotides De Novo Biosynthesis                | 4.4E-01  | 1.85E-02 | ENTPD7                   |
| Fatty Acid $\beta$ -oxidation I                                | 4.4E-01  | 2.22E-02 | ACSL4                    |
| Neuregulin Signaling                                           | 4.22E-01 | 1.92E-02 | HBEGF,AREG               |
| B Cell Development                                             | 4.18E-01 | 2.78E-02 | CD40                     |
| Retinoate Biosynthesis I                                       | 4.18E-01 | 2.7E-02  | BMP2                     |
| Serotonin Receptor Signaling                                   | 4.08E-01 | 2.04E-02 | SMOX                     |
| 3-phosphoinositide Biosynthesis                                | 4.03E-01 | 1.66E-02 | DUSP10,DUSP1,SOCS3       |
| Aldosterone Signaling in Epithelial Cells                      | 3.98E-01 | 1.78E-02 | HSPA2,DUSP1,SGK1         |
| G Protein Signaling Mediated by Tubby                          | 3.98E-01 | 2.27E-02 | JAK2                     |
| Inhibition of Angiogenesis by TSP1                             | 3.98E-01 | 2.38E-02 | NOS3                     |
| tRNA Splicing                                                  | 3.88E-01 | 2.17E-02 | PDE4B                    |
| Stearate Biosynthesis I (Animals)                              | 3.88E-01 | 2.04E-02 | ACSL4                    |

|                                                            |          |          |                          |
|------------------------------------------------------------|----------|----------|--------------------------|
| Noradrenaline and Adrenaline Degradation                   | 3.79E-01 | 1.89E-02 | SMOX                     |
| Neuropathic Pain Signaling In Dorsal Horn Neurons          | 3.56E-01 | 1.83E-02 | FOS,BDNF                 |
| Netrin Signaling                                           | 3.53E-01 | 1.72E-02 | NFATC1                   |
| Paxillin Signaling                                         | 3.51E-01 | 1.71E-02 | ITGAV,ARF6               |
| Transcriptional Regulatory Network in Embryonic Stem Cells | 3.45E-01 | 2.33E-02 | SKIL                     |
| Melanoma Signaling                                         | 3.3E-01  | 2E-02    | CDKN1A                   |
| UVC-Induced MAPK Signaling                                 | 3.3E-01  | 2.27E-02 | FOS                      |
| NGF Signaling                                              | 3.23E-01 | 1.64E-02 | NFKB1,CREB5              |
| Role of Oct4 in Mammalian Embryonic Stem Cell Pluripotency | 3.08E-01 | 1.92E-02 | JARID2                   |
| Sertoli Cell-Sertoli Cell Junction Signaling               | 3.07E-01 | 1.52E-02 | TNF,CLDN4,NOS3           |
| Androgen Signaling                                         | 3.02E-01 | 1.38E-02 | NFKB1,SMAD3              |
| Gas Signaling                                              | 3.02E-01 | 1.6E-02  | CREB5,RGS2               |
| Calcium Signaling                                          | 2.97E-01 | 1.38E-02 | CREB5,RCAN1,NFATC1       |
| Ephrin A Signaling                                         | 2.89E-01 | 1.85E-02 | EPHA2                    |
| 14-3-3-mediated Signaling                                  | 2.82E-01 | 1.65E-02 | FOS,TNF                  |
| Protein Ubiquitination Pathway                             | 2.76E-01 | 1.48E-02 | HSPA2,BIRC2,NEDD4L,BIRC3 |
| Sperm Motility                                             | 2.74E-01 | 1.39E-02 | PDE4B,PLA2G4A            |
| CNTF Signaling                                             | 2.66E-01 | 1.75E-02 | JAK2                     |
| Endometrial Cancer Signaling                               | 2.66E-01 | 1.67E-02 | FOXO3                    |
| Primary Immunodeficiency Signaling                         | 2.66E-01 | 1.56E-02 | CD40                     |
| mTOR Signaling                                             | 2.64E-01 | 1.41E-02 | RHOH,RHOB,RND3           |
| Gai Signaling                                              | 2.63E-01 | 1.48E-02 | CXCR2,ADORA3             |
| IL-2 Signaling                                             | 2.6E-01  | 1.64E-02 | FOS                      |
| Role of CHK Proteins in Cell Cycle Checkpoint Control      | 2.5E-01  | 1.69E-02 | CDKN1A                   |
| EGF Signaling                                              | 2.45E-01 | 1.56E-02 | FOS                      |
| Cellular Effects of Sildenafil (Viagra)                    | 2.4E-01  | 1.29E-02 | NOS3, PDE4B              |
| Regulation of Cellular Mechanics by Calpain Protease       | 2.4E-01  | 1.37E-02 | EZR                      |
| Phospholipases                                             | 2.35E-01 | 1.47E-02 | PLA2G4A                  |
| Superpathway of Melatonin Degradation                      | 2.26E-01 | 1.23E-02 | SMOX                     |
| Serotonin Degradation                                      | 2.21E-01 | 1.28E-02 | SMOX                     |
| Eicosanoid Signaling                                       | 2.13E-01 | 1.16E-02 | PLA2G4A                  |

|                                                   |          |          |        |
|---------------------------------------------------|----------|----------|--------|
| Antiproliferative Role of Somatostatin Receptor 2 | 2.09E-01 | 1.39E-02 | CDKN1A |
| Non-Small Cell Lung Cancer Signaling              | 2.05E-01 | 1.2E-02  | FOXO3  |
| Pyridoxal 5'-phosphate Salvage Pathway            | 2.01E-01 | 1.32E-02 | SGK1   |
| Mitotic Roles of Polo-Like Kinase                 | 1.97E-01 | 1.35E-02 | PLK2   |

46

47

**Part b:** Pathways down-regulated

|                                                                 | <b>-log<br/>(p-value)</b> | <b>Ratio</b> | <b>Molecules</b> |
|-----------------------------------------------------------------|---------------------------|--------------|------------------|
| <b>Ingenuity Canonical Pathways</b>                             |                           |              |                  |
| PXR/RXR Activation                                              | 2.28E00                   | 2.17E-02     | ABCC2,CPT1A      |
| FXR/RXR Activation                                              | 2.07E00                   | 1.82E-02     | ABCC2,MTTP       |
| Mitochondrial L-carnitine Shuttle Pathway                       | 1.57E00                   | 4.55E-02     | CPT1A            |
| Granulocyte Adhesion and Diapedesis                             | 1.49E00                   | 1.1E-02      | CCL24,PECAM1     |
| Agranulocyte Adhesion and Diapedesis                            | 1.44E00                   | 1.04E-02     | CCL24,PECAM1     |
| LPS/IL-1 Mediated Inhibition of RXR Function                    | 1.31E00                   | 8.16E-03     | ABCC2,CPT1A      |
| Complement System                                               | 1.28E00                   | 2.86E-02     | C4BPA            |
| Erythropoietin Signaling                                        | 9.87E-01                  | 1.27E-02     | CBL              |
| Chemokine Signaling                                             | 9.75E-01                  | 1.33E-02     | CCL24            |
| Ephrin B Signaling                                              | 9.46E-01                  | 1.22E-02     | CBL              |
| FLT3 Signaling in Hematopoietic Progenitor Cells                | 9.41E-01                  | 1.27E-02     | CBL              |
| RANK Signaling in Osteoclasts                                   | 8.81E-01                  | 1.03E-02     | CBL              |
| Fcγ Receptor-mediated Phagocytosis in Macrophages and Monocytes | 8.54E-01                  | 9.43E-03     | CBL              |
| T Cell Receptor Signaling                                       | 8.37E-01                  | 9.17E-03     | CBL              |
| Telomerase Signaling                                            | 8.2E-01                   | 9.43E-03     | TPP1             |
| HIF1α Signaling                                                 | 8.13E-01                  | 8.93E-03     | EGLN1            |
| CCR3 Signaling in Eosinophils                                   | 7.69E-01                  | 7.46E-03     | CCL24            |
| 14-3-3-mediated Signaling                                       | 7.62E-01                  | 8.26E-03     | CBL              |
| PTEN Signaling                                                  | 7.58E-01                  | 7.19E-03     | CBL              |
| Gαi Signaling                                                   | 7.45E-01                  | 7.41E-03     | NPR3             |
| PI3K Signaling in B Lymphocytes                                 | 7.26E-01                  | 6.99E-03     | CBL              |
| Insulin Receptor Signaling                                      | 7.14E-01                  | 6.71E-03     | CBL              |
| AMPK Signaling                                                  | 7.06E-01                  | 5.52E-03     | CPT1A            |

|                                                                           |          |          |        |
|---------------------------------------------------------------------------|----------|----------|--------|
| Hepatic Cholestasis                                                       | 6.94E-01 | 5.46E-03 | ABCC2  |
| Mitochondrial Dysfunction                                                 | 6.26E-01 | 4.65E-03 | CPT1A  |
| Acute Phase Response Signaling                                            | 6.19E-01 | 5.52E-03 | C4BPA  |
| NRF2-mediated Oxidative Stress Response                                   | 5.95E-01 | 5.13E-03 | ABCC2  |
| Clathrin-mediated Endocytosis Signaling                                   | 5.85E-01 | 5.05E-03 | CBL    |
| Leukocyte Extravasation Signaling                                         | 5.6E-01  | 4.76E-03 | PECAM1 |
| Actin Cytoskeleton Signaling                                              | 5.31E-01 | 4.13E-03 | SSH1   |
| Role of Osteoblasts, Osteoclasts and Chondrocytes in Rheumatoid Arthritis | 5.21E-01 | 4E-03    | CBL    |
| cAMP-mediated signaling                                                   | 5.21E-01 | 4.42E-03 | NPR3   |
| Systemic Lupus Erythematosus Signaling                                    | 5.18E-01 | 3.92E-03 | CBL    |
| Protein Ubiquitination Pathway                                            | 4.68E-01 | 3.7E-03  | CBL    |
| G-Protein Coupled Receptor Signaling                                      | 4.64E-01 | 3.62E-03 | NPR3   |
| Xenobiotic Metabolism Signaling                                           | 4.47E-01 | 3.47E-03 | ABCC2  |
| Molecular Mechanisms of Cancer                                            | 3.68E-01 | 2.58E-03 | CBL    |
